# Supplementary material for: Optimized Method for the Identification of Candidate Genes and Molecular Maker Development Related to Drought Tolerance in Oil Palm (Elaeis guineensis Jacq.)
Source: MDPI journal article supplement (doi:10.3390/plants11172317), 2022-09-04
Supplement: s1 [file s1]

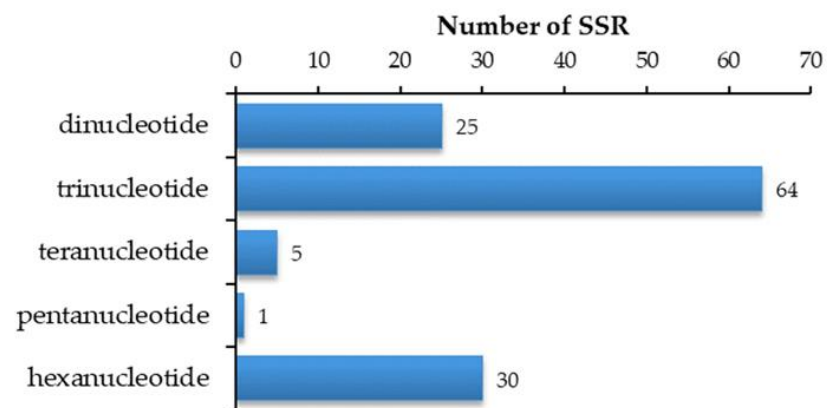

**Supplementary Figure S1.** The distribution of repeated sequence.

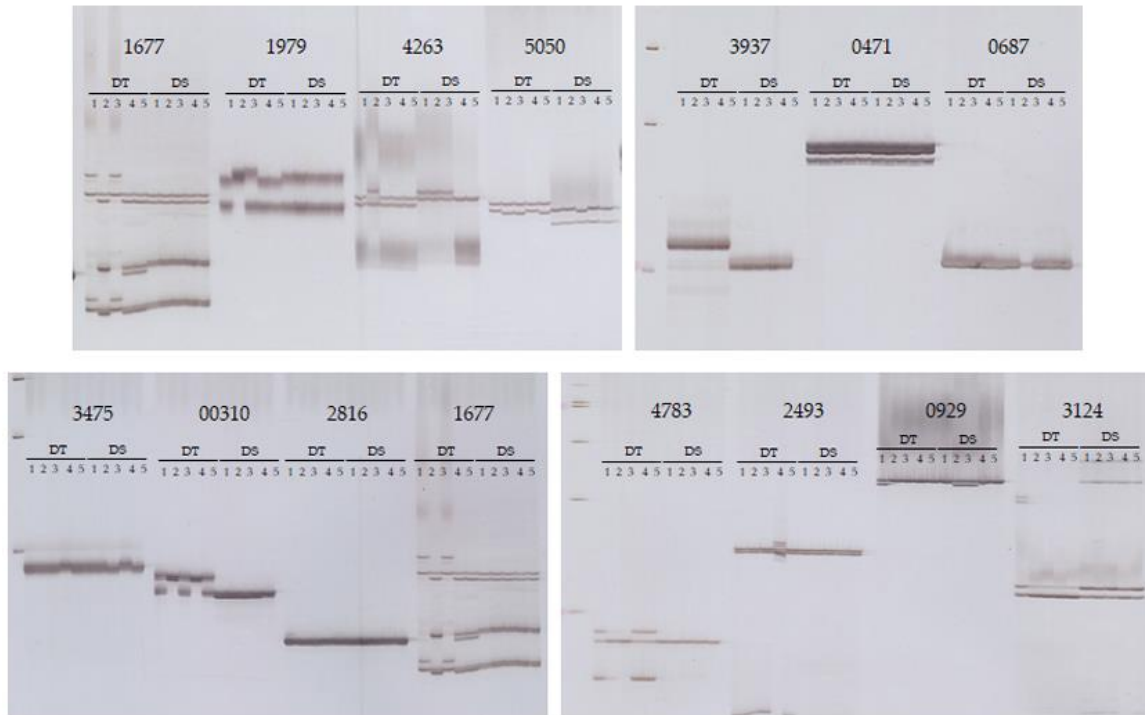

**Supplementary Figure S2.** Polymorphism banding of five primers that clearly distinguished the differentiation between drought tolerant and drought-sensitive variety when separated on 5% denaturing polyacrylamide gel electrophoresis.

**Supplementary Table S1.** Nucleotide sequence obtain form PCR product of leaf and root of oil palm dehydrated for 90 days compared with NCBI database via BASTN

| DNA banding name | Size (bp) | Similarity                                                                                                                                            | Accession no.  | E-value | species                            | % similarity  |
|------------------|-----------|-------------------------------------------------------------------------------------------------------------------------------------------------------|----------------|---------|------------------------------------|---------------|
| O2A2-L4          | 324       | PREDICTED: <i>Phoenix dactylifera</i> histone H2A (LOC103696590), mRNA                                                                                | XM_008778268.1 | 3e-114  | <i>Phoenix dactylifera</i>         | 89%(289/325)  |
| O2A2-L9          | 258       | PREDICTED: <i>Phoenix dactylifera</i> protein FEZ-like (OC103703150), mRNA                                                                            | XM_008785901.1 | 2e-83   | <i>P. dactylifera</i>              | 95% 193/204)  |
| O2A2-L11         | 190       | PREDICTED: <i>Phoenix dactylifera</i> transcription factor bHLH106-like (LOC103705042), mRNA                                                          | XM_008788632.1 | 1e-52   | <i>P. dactylifera</i>              | 97% 125/129)  |
| O2A2-R4          | 290       | <i>Elaeis guineensis</i> cysteine proteinase (CPRS1) mRNA, complete cds                                                                               | EF622021.1     | 4e-104  | <i>E. guineensis</i> Jacq          | 99% 217/219)  |
| O2A2-R8          | 226       | PREDICTED: <i>Phoenix dactylifera</i> putative germin-like protein 2-1 (LOC103719636), mRNA                                                           | XM_008808973.1 | 9e-36   | <i>P. dactylifera</i>              | 91% 104/114)  |
| O2A2-R9          | 220       | PREDICTED: <i>Phoenix dactylifera</i> uncharacterized LOC103716595 (LOC103716595), transcript variant X1, ncRNA                                       | XR_605548.1    | 3e-42   | <i>P. dactylifera</i>              | 79%(173/219)  |
| O2A5-L3          | 417       | <i>Chroococcidiopsis thermalis</i> PCC 7203, complete genome                                                                                          | CP003597.1     | 6e-130  | <i>Chroococcidiopsis thermalis</i> | 85% 354/415)  |
| O2A5-L9          | 275       | <i>Phoenix dactylifera</i> mitochondrion, complete genome                                                                                             | JN375330.1     | 1e-135  | <i>P. dactylifera</i>              | 99%(274-275)  |
| O2A5-L11         | 264       | PREDICTED: <i>Citrus sinensis</i> uncharacterized LOC102626228 (LOC102626228), mRNA                                                                   | XM_006464828.1 | 1e-27   | <i>Citrus sinensis</i>             | 76% 139/183)  |
| O2A5-L17         | 201       | <i>Oryza granulate</i> clone OG_ABa0049D11, complete sequence                                                                                         | AC240779.1     | 1e-14   | <i>Oryza granulate</i>             | 74%(102/137)  |
| O2A5-R4          | 239       | PREDICTED: <i>Phoenix dactylifera</i> primary amine oxidase-like (LOC103706132), mRNA                                                                 | XM_008790138.1 | 4e-09   | <i>P. dactylifera</i>              | 74% (81/109)  |
| O4A3-L1          | 399       | PREDICTED: <i>Phoenix dactylifera</i> plasminogen activator 1RNA-binding protein-like (LOC103721814), mRNA                                            | XM_008812160.1 | 1e-125  | <i>P. dactylifera</i>              | 88%(325/368)  |
| O4A3-L2          | 236       | PREDICTED: <i>Phoenix dactylifera</i> 3'-N-debenzol-2'-deoxytaxol N-benzoyltransferase-like (LOC103720896), mRNA                                      | XM_008810860.1 | 5e-27   | <i>P. dactylifera</i>              | 82% 110/1340) |
| O4A3-L4          | 649       | <i>Elaeis guineensis</i> disrupted DEF1 gene, partial sequence; and retrotransposons RLG_Koala_Eg133H20-1 and RLC_Rider_Eg133H20-1, complete sequence | KF142646.1     | 7e-138  | <i>E. guineensis</i> Jacq          | 84% (387/460) |

**Supplementary Table S1.** Nucleotide sequence obtain form PCR product of leaf and root of oil palm dehydrated for 90 days compared with NCBI database via BASTN (cont.)

| DNA banding name | Size (bp) | similarity                                                                                                                                            | Accession no.  | E-value | species                       | % similarity  |
|------------------|-----------|-------------------------------------------------------------------------------------------------------------------------------------------------------|----------------|---------|-------------------------------|---------------|
| O4A3-L6          | 521       | <i>Theobroma cacao</i> PIF1 helicase, putative (TCM016903) mRNA, complete cds                                                                         | XM_007031435.1 | 1e-15   | <i>Theobroma cacao</i>        | 72% (126/175) |
| O4A3-L12         | 382       | PREDICTED: <i>Phoenix dactylifera</i> transcription initiation factor TFIID subunit 8-like (LOC103695623), mRNA                                       | XM_008776988.1 | 1e-04   | <i>P. dactylifera</i>         | 92% 936/39)   |
| O4A3-L13         | 305       | <i>Phoenix dactylifera</i> ATP sulfurylase 1, chloroplastic-like (LOC103720197), transcript variant X2, mRNA                                          | XM_008809802.1 | 4e-36   | <i>P. dactylifera</i>         | 74% 9201/27)  |
| O4A3-L14         | 351       | <i>Elaeis guineensis</i> repetitive DNA, clone pEgkB17                                                                                                | AJ271979.1     | 3e-82   | <i>Elaeis guineensis</i> Jacq | 85% 241/283)  |
| O4A3-L16         | 311       | PREDICTED: <i>Phoenix dactylifera</i> ATP sulfurylase 1, chloroplastic-like (LOC103720197), transcript variant X2, mRNA                               | XM_008809802.1 | 8e-32   | <i>P. dactylifera</i>         | 73% 198/273)  |
| O4A3-L17         | 330       | <i>Populus trichocarpa</i> clone POP081-J22, complete sequence                                                                                        | AC216474.1     | 8e-07   | <i>Populus trichocarpa</i>    | 85% (47/55)   |
| O4A3-L20         | 353       | PREDICTED: <i>Phoenix dactylifera</i> peroxisome biogenesis protein 3-1-like (LOC103723476), transcript variant X2, mRNA                              | XM_008814395.1 | 7e-46   | <i>P. dactylifera</i>         | 91% 130/143)  |
| O4A3-L25         | 200       | PREDICTED: <i>Phoenix dactylifera</i> alpha, alpha-trehalose-phosphate synthase [UDP-forming] 6-like (LOC103706802), transcript variant X5, mRNA      | XM_008791043.1 | 2e-74   | <i>P. dactylifera</i>         | 94% 178/189)  |
| O4A3-L33         | 248       | PREDICTED: <i>Phoenix dactylifera</i> probable protein phosphatase 2C 23 (LOC103696816), mRNA                                                         | XM_008778537.1 | 4e-22   | <i>P. dactylifera</i>         | 95% (69/73)   |
| O4A3-L39         | 225       | PREDICTED: <i>Phoenix dactylifera</i> probable LRR receptor-like serine/ threonine-protein kinase At3g47570 (LOC103724159), mRNA                      | XM_008815330.1 | 3e-74   | <i>P. dactylifera</i>         | 91% 186/204)  |
| O4A3-L50         | 186       | <i>Elaeis guineensis</i> disrupted DEF1 gene, partial sequence; and retrotransposons RLG_Koala_Eg133H20-1 and RLC_Rider_Eg133H20-1, complete sequence | KF142646.1     | 3e-28   | <i>E. guineensis</i> Jacq     | 78% 143/184)  |

**Supplementalry Table S2.** Nucleotide sequence obtain form PCR product of leaf and root of oil palm dehydrated for 90 days compared with NCBI database via BASTX.

| DNA<br>banding<br>name | Function                                       | size<br>(bp) | Sequence similarity                                                    | BLASTX         |         |                                    |               |                  |
|------------------------|------------------------------------------------|--------------|------------------------------------------------------------------------|----------------|---------|------------------------------------|---------------|------------------|
|                        |                                                |              |                                                                        | Accession no.  | E-value | species                            | Amino<br>acid | %<br>similarity  |
| O2A2-L4                | Histone<br>acetylation<br>and<br>deacetylation | 324          | histone H2A                                                            | XM_010907423.1 | 1e-05   | <i>E. guineensis</i>               | 22            | 95%<br>(21/220)  |
| O2A2-L9                | Cell division                                  | 258          | PREDICTED: protein FEZ-like                                            | XP_008784123.1 | 1e-38   | <i>P. dactylifera</i>              | 67            | 99%<br>(67/68)   |
| O2A2--L11              | Transcription<br>process                       | 190          | PREDICTED: transcription factor<br>bHLH106-like                        | XP_008786854.1 | 2e-18   | <i>P. dactylifera</i>              | 42            | 95%<br>(42/44)   |
| O2A2-R4                | Metabolic<br>processes                         | 290          | cysteine proteinase                                                    | ABR19829.1     | 0.001   | <i>E. guineensis</i>               | 15            | 100%<br>(15/15)  |
| O2A5-L3                | Adenylate<br>cyclase activity                  | 417          | Putative adenylate/guanylate<br>cyclase                                | WP_015152518.1 | 5e-77   | <i>C. thermalis</i>                | 118           | 86%<br>(118/138) |
| O2A5-L9                | -                                              | 275          | Hypothetical protein MTR<br>1g006860                                   | XP_003588402.1 | 9e-09   | <i>Medicago<br/>trunculata</i>     | 25            | 83%<br>(25/30)   |
| O2A5-L11               | DNA<br>integration                             | 264          | Retrotransposon protein,<br>putative unclassified                      | ABF96015.1     | 8e-32   | <i>O. sativa</i> Japonica<br>group | 53            | 62%<br>(53/85)   |
| O2A5-L17               | -                                              | 201          | PREDICTED: uncharacterized<br>protein LOC102607673                     | XP_006486503.1 | 5e-19   | <i>C. sinensis</i>                 | 41            | 65%<br>(41/63)   |
| O4A3-L2                | Transferase<br>activity                        | 236          | 3'-N-debenzoyl-2'-deoxytaxol N-<br>benzoyltransferase                  | XP_008778035.1 | 3e-06   | <i>P. dactylifera</i>              | 18            | 62%<br>(18/29)   |
| O4A3-L4                | -                                              | 649          | Hypothetical protein VITISV<br>040104                                  | CAN76612.1     | 4e-18   | <i>V. vinifera</i>                 | 45            | 44%<br>(45/103)  |
| O4A3-L6                | DNA helicase                                   | 521          | PIF1 helicase, putative                                                | XP_007031497.1 | 6e-37   | <i>T. cacao</i>                    | 75            | 49%<br>(75/153)  |
| O4A3-L13               | -                                              | 305          | PREDICTED: uncharacterized<br>protein LOC103714969                     | XP_008800680.1 | 3e-27   | <i>P. dactylifera</i>              | 54            | 58%<br>(54/93)   |
| O4A3-L16               | -                                              | 311          | PREDICTED: uncharacterized<br>protein LOC103714969                     | XP_008800680.1 | 2e-28   | <i>P. dactylifera</i>              | 56            | 57%<br>(56/98)   |
| O4A3-L19               | Protein RNA-<br>binding<br>activity            | 323          | PREDICTED: pentatricopeptide<br>repeat-containing protein<br>At4g22760 | XP_008803996.1 | 2e-06   | <i>P.dactylifera</i>               | 21            | 45%<br>(21/47)   |

**Supplementary Table S2.** Nucleotide sequence obtain form PCR product of leaf and root of oil palm dehydrated for 90 days compared with NCBI database via BASTX. (cont.)

| DNA<br>banding<br>name | Function               | size<br>(bp) | Sequence similarity                                                                         | BLASTX         |         |                        |               |                 |
|------------------------|------------------------|--------------|---------------------------------------------------------------------------------------------|----------------|---------|------------------------|---------------|-----------------|
|                        |                        |              |                                                                                             | Accession no.  | E-value | species                | Amino<br>acid | %<br>similarity |
| O4A3-L20               | Peroxisome             | 353          | PREDICTED: peroxisome<br>biogenesis protein 3-2-like                                        | XP_008803262.1 | 3e-13   | <i>P. dactylifera</i>  | 35            | 73%<br>(35/480) |
| O4A3-L25               | Trehalose<br>synthesis | 200          | PREDICTED: alpha, alpha-<br>trehalose-phosphate synthase<br>[UDP-forming] 6-like isoform X1 | XP_008789260.1 | 2e-14   | <i>P. dactylifera</i>  | 38            | 86%<br>(38/44)  |
| O4A3-L38               | Signaling              | 226          | Serine/threonine-protein<br>phosphatase 7 long form<br>homolog                              | XP_004496822.1 | 8e-06   | <i>Cicer arietinum</i> | 19            | 44%<br>(19/43)  |
| O4A3-L39               | Signaling              | 225          | PREDICTED: probable LRR<br>receptor-like serine/threonine-<br>protein kinase At3g47570      | XP_008813552.1 | 2e-20   | <i>P. dactylifera</i>  | 59            | 88%<br>(59/67)  |
| O4A3-L41               | -                      | 221          | PREDICTED: uncharacterized<br>protein LOC103697118                                          | XP_008777135.1 | 8e-07   | <i>P. dactylifera</i>  | 27            | 42%<br>(27/64)  |

**Supplementary Table S3.** BLASTX from pyrosequencing technology of oil palm after water deficit for 45 days.

| No | Protein                                                      | Copy No. |       |
|----|--------------------------------------------------------------|----------|-------|
|    |                                                              | DT-01    | ST-02 |
| 1  | Putative senesce-associated protein                          | 20       | 5     |
| 2  | Transcription factor, putative                               | 78       | 12    |
| 3  | Putative MYB transcription factor                            | 2        | 3     |
| 4  | MYBR domain transcription factor                             | 1        | -     |
| 5  | Putative R2R3-MYB transcription factor                       | 1        | -     |
| 6  | Transcription factor R2R3-MYB1                               | 3        | -     |
| 7  | Transcription factor R2R3-MYB2                               | -        | 1     |
| 8  | Transcription factor MYB1                                    | -        | 3     |
| 9  | Transcription factor 1R-MYB1                                 | 1        | 1     |
| 10 | ANAC083 transcription factor                                 | 4        | 3     |
| 11 | NAC domain transcription factor                              | 1        | -     |
| 12 | bZIP family transcription factor                             | 7        | 2     |
| 13 | Transcription factor AP2D9                                   | 2        | 1     |
| 14 | MADS-box transcription factor                                | 7        | -     |
| 15 | Type 1 MADS-box transcription factor                         | 6        | -     |
| 16 | AP2/ERF domain-containing transcription factor               | 2        | 2     |
| 17 | AP2/EREBP transcription factor, putative                     | 1        | -     |
| 18 | Heat stress transcription factor A-1                         | 4        | 1     |
| 19 | Heat stress transcription factor A-2c                        | 1        | -     |
| 20 | Heat stress transcription factor A3                          | 1        | -     |
| 21 | Ethylene transcription factor                                | 1        | -     |
| 22 | WRKY transcription factor, putative                          | 1        | 2     |
| 23 | WRKY transcription factor 7                                  | -        | 1     |
| 24 | WRKY1 transcription factor 20                                | -        | 5     |
| 25 | WRKY1 transcription factor 21                                | 1        | -     |
| 26 | WRKY transcription factor 24                                 | -        | 2     |
| 27 | WRKY transcription factor 27                                 | 1        | -     |
| 28 | WRKY domain transcription factor                             | 2        | -     |
| 29 | Transcription factor WRKY-1                                  | 3        | -     |
| 30 | WRKY51-superfamily of TFs having WRKY and zinc finger domain | 2        | -     |
| 31 | Putative alfin-like transcription factor                     | 1        | 3     |
| 32 | BTF3b-like transcription factor                              | 2        | 1     |
| 33 | bHLH transcription factor                                    | 8        | 9     |
| 34 | Transcription factor jumonji domain-containing protein       | 1        | -     |
| 35 | HD domain class transcription factor                         | 2        | 2     |
| 36 | GRAS family transcription factor                             | 5        | 2     |
| 37 | TLP domain class transcription factor                        | 3        | -     |
| 38 | CAMTA domain class transcription factor                      | 2        | -     |
| 39 | SCL domain class transcription factor                        | 3        | -     |
| 40 | Betain aldehyde dehydrogenase                                | 2        | -     |
| 41 | Pyrroline-5-carboxylate reductase                            | 1        | 3     |

**Supplementary Table S3.** BLASTX from pyrosequencing technology of oil palm after water deficit for 45 days. (cont.)

| No | Protein                                             | Copy No. |       |
|----|-----------------------------------------------------|----------|-------|
|    |                                                     | DT-01    | ST-02 |
| 42 | 1-pyrroline-5-carboxylate dehydrogenase, putative   | 1        | -     |
| 43 | Delta-1- pyrroline-5-carboxylate dehydrogenase      | 5        | -     |
| 44 | Trehalose-6-phosphate synthase                      | 6        | 11    |
| 45 | Glucose-6-phosphate isomerase                       | 2        | 4     |
| 46 | Mannitol 2-dehydrogenase [NADP <sup>+</sup> ]       | 2        | -     |
| 47 | Superoxide dismutase                                | 3        | 1     |
| 48 | Copper/Zinc Superoxide dismutase                    | 5        | 1     |
| 49 | Fe-superoxide dismutase                             | 1        | 3     |
| 50 | Copper chaperone for superoxide dismutase           | 1        | 1     |
| 51 | Catalase                                            | 2        | 6     |
| 52 | Catalase 2                                          | 1        | 1     |
| 53 | Ascorbate peroxidase                                | 2        | -     |
| 54 | Monodehydroascorbate reductase                      | 3        | 2     |
| 55 | Peroxisome type ascorbate peroxidase                | 1        | 4     |
| 56 | Cytosolic ascorbate peroxidase                      | 3        | 3     |
| 57 | Cytosolic ascorbate peroxidase 2                    | 2        | -     |
| 58 | Nucleobase ascorbate transportor                    | 4        | -     |
| 59 | Peroxidase                                          | 3        | 2     |
| 60 | Peroxidase 65 precursor, putative                   | -        | 1     |
| 61 | Peroxidase 73 precursor, putative                   | -        | 1     |
| 62 | Thiorioxin peroxidase                               | 1        | 1     |
| 63 | Glutathione reductase, putative                     | 5        | 7     |
| 64 | Glutathione transferase, putative                   | 2        | 2     |
| 65 | Glutathione transferase III(b)                      | 3        | 2     |
| 66 | Glutathione S-transferase                           | 3        | 9     |
| 67 | Glutathione S-transferase Cla47                     | 1        | -     |
| 68 | Glutathione peroxidase                              | 4        | 5     |
| 69 | Phospholipid hydroperoxidase glutathione peroxidase | 1        | -     |
| 70 | Tau glutathione S-transferase                       | 3        | -     |
| 71 | Chloroplastic glutathione reductase                 | 1        | -     |
| 78 | Protein phosphatase 2C                              | 10       | 4     |
| 79 | Protein phosphatase 2C containing protein           | 1        | 2     |
| 80 | NAC-like protein                                    | 3        | 3     |
| 81 | NAC domain protein                                  | 4        | 5     |
| 82 | NAC protein 1                                       | 2        | 3     |
| 83 | MYB                                                 | 1        | -     |
| 84 | MYB 1                                               | -        | 3     |
| 85 | MYB 6                                               | -        | 3     |
| 86 | MYC2 bHLH protein                                   | 3        | -     |
| 87 | Helicase, putative                                  | 6        | 2     |
| 88 | Helicase domain-containing protein                  | 7        | -     |



**Supplementary Table S3.**BLASTX from pyrosequencing technology of oil palm after water deficit for 45 days. (cont.)

| No  | Protein                                                            | Copy No. |       |
|-----|--------------------------------------------------------------------|----------|-------|
|     |                                                                    | DT-01    | ST-02 |
| 89  | ATP-dependent RNA helicase                                         | 11       | 4     |
| 90  | DEAD-boxATP-dependent RNA helicase, putative                       | 17       | 14    |
| 91  | DEAD-boxRNA helicase                                               | 3        | -     |
| 92  | Chromodomain helicase DNA binding protein                          | 4        | -     |
| 93  | RNA helicase-like protein                                          | 3        | 1     |
| 94  | Ethylene response factor                                           | 3        | 4     |
| 95  | Ethylene response protein                                          | 1        | -     |
| 96  | Ethylene response 3                                                | 4        | -     |
| 97  | Ethylene responsive transcription factor 2a                        | -        | 1     |
| 98  | Ethylene responsive transcriptional coactivator                    | 5        | -     |
| 99  | Putative ethylene-responsive elongation factor EF-Ts precursor     | 1        | 1     |
| 100 | Ethylene receptor                                                  | 1        | 5     |
| 101 | Ethylene response sensor 1                                         | 2        | -     |
| 102 | Beta-galactosidase                                                 | 7        | 8     |
| 103 | Beta-D-galactosidase                                               | 5        | 4     |
| 104 | Alkaline alpha galactosidase                                       | 1        | -     |
| 105 | Oil palm polygalacturonase allergen PEST 459                       | 10       | -     |
| 106 | Polygalacturonase 2                                                | 1        | -     |
| 107 | Polygalacturonase-1 non-catalytic subunit beta precursor, putative | 1        | -     |
| 108 | Heat shock protein, putative                                       | 4        | 4     |
| 109 | Heat shock binding protein                                         | 8        | -     |
| 110 | Heat shock protein 101                                             | 1        | 1     |
| 111 | 101 kDa Heat shock protein                                         | 2        | -     |
| 112 | Heat shock protein 90                                              | 2        | 1     |
| 113 | Heat shock protein 70                                              | 3        | 5     |
| 114 | Heat shock protein 70 (HSP70)-interacting protein, putative        | 3        | 8     |
| 115 | Heat shock protein DnaJ                                            | 2        | -     |
| 116 | Heat shock protein DnaJ, N-terminal                                | 3        | 1     |
| 117 | Small heat shock protein, chloroplastic                            | 3        | 4     |

**Supplementary Table S4.** Gene ontology analysis of repeated base sequence at GO level2 of oil palm under water deficit for 45 days.

| GO-IDs                    | GO-term                                            | Seqs |
|---------------------------|----------------------------------------------------|------|
| <b>Biological process</b> |                                                    |      |
| GO:0009987                | cellular process                                   | 49   |
| GO:0008152                | metabolic process                                  | 49   |
| GO:0044699                | single-organism process                            | 25   |
| GO:0065007                | biological regulation                              | 13   |
| GO:0071840                | cellular component organization or biogenesis      | 12   |
| GO:0050789                | regulation of biological process                   | 12   |
| GO:0050896                | response to stimulus                               | 11   |
| GO:0051179                | localization                                       | 8    |
| GO:0032502                | developmental process                              | 5    |
| GO:0032501                | multicellular organismal process                   | 5    |
| GO:0023052                | signaling                                          | 3    |
| GO:0022414                | reproductive process                               | 3    |
| GO:0000003                | reproduction                                       | 3    |
| GO:0048519                | negative regulation of biological process          | 2    |
| GO:0098754                | detoxification                                     | 1    |
| <b>Molecular function</b> |                                                    |      |
| GO:0005488                | binding                                            | 32   |
| GO:0003824                | catalytic activity                                 | 27   |
| GO:0005215                | transporter activity                               | 4    |
| GO:0005198                | structural molecule activity                       | 4    |
| GO:0001071                | nucleic acid binding transcription factor activity | 2    |
| GO:0009055                | electron carrier activity                          | 2    |
| GO:0000988                | transcription factor activity, protein binding     | 1    |
| GO:0016209                | antioxidant activity                               | 1    |
| <b>Cellular component</b> |                                                    |      |
| GO:0044464                | cell part                                          | 55   |
| GO:0005623                | cell                                               | 55   |
| GO:0043226                | organelle                                          | 42   |
| GO:0044422                | organelle part                                     | 19   |
| GO:0016020                | membrane                                           | 18   |
| GO:0032991                | macromolecular complex                             | 15   |
| GO:0044425                | membrane part                                      | 13   |
| GO:0031974                | membrane-enclosed lumen                            | 2    |
| GO:0009295                | nucleoid                                           | 2    |
| GO:0099080                | supramolecular complex                             | 1    |
| GO:0030054                | cell junction                                      | 1    |
| GO:0055044                | symplast                                           | 1    |

**Supplementary Table S5.** Comparison of expressed gene associated with drought tolerance from DDRT-RT and pyrosequencing database.

| Seq. name | Seq. Size (bp) | DS          |               |          |            | DT          |             |           |            | Blastx with Predicted CDS from MPBO | NCBI Accession No. | Blastx with NCBI                                                     | Pyrosequencing                                                |
|-----------|----------------|-------------|---------------|----------|------------|-------------|-------------|-----------|------------|-------------------------------------|--------------------|----------------------------------------------------------------------|---------------------------------------------------------------|
|           |                | Isotig name | Isotig length | E-value  | % homology | Isotig name | Isotig Size | E-value   | % homology |                                     |                    | DDRT                                                                 |                                                               |
| O2A2-L4   | 324            | isotig00907 | 576           | e-146    | 99%        | -           | -           | -         | -          | p5.00_sc00270_p0015                 | XM_010907423.1     | histone H2A                                                          | histone H2A                                                   |
| O2A2-L11  | 190            | -           | -             | -        | -          | -           | -           | -         | -          | p5.00_sc00189_p0010                 | XP_010931526.1     | transcription factor bHLH106                                         | -                                                             |
| O2A2-R4   | 290            | isotig01193 | 1438          | 0.00     | 100%       | isotig01724 | 1440        | 0.00      | 100%       | p5.00_sc00100_p0051                 | ABR19829.1         | cysteine proteinase                                                  | oryza in gamma chain-like /cysteine proteinase                |
| O4A3-L6   | 521            | -           | -             | -        | -          | -           | -           | -         | -          | p5.00_sc00018_p0147                 | XP_020080716.1     | ATP-dependent DNA helicase PIF1-like                                 | -                                                             |
| O4A3-L19  | 323            | isotig03948 | 393           | 3.00e-35 | 55%        | isotig04518 | 598         | 2.00e-16  | 32%        | P 5.00_sc00009_p0130                | XP_039139688.1     | pentatricopeptide repeat-containing protein At4g22760-like           | pentatricopeptide repeat-containing protein At1g04840         |
| O4A3-L25  | 200            | isotig00740 | 949           | 4.00e-99 | 87.5%      | -           | -           | -         | -          | p5.00_sc00004_p0342                 | XP_010932535.1     | alpha, alpha-trehalose-phosphate synthase [UDP-forming] 6            | trehalose-6-phosphate synthase, putative                      |
| O4A3-L38  | 226            | -           | -             | -        | -          | isotig03061 | 821         | 1.00e-117 | 92%        | p5.00_sc00001_p0208                 | XP_004496822.1     | Serine/threonine-protein phosphatase 7 long form homolog             | Serine/threonine protein phosphatase PP1, putative, expressed |
| O4A3-L39  | 225            | -           | -             | -        | -          | -           | -           | -         | -          | p5.00_sc00001_p0001                 | XP_008813552.1     | probable LRR receptor-like serine/threonine-protein kinase At3g47570 | -                                                             |

**Supplementary Table S6.** Allele and genotype frequency of drought-tolerance and drought-sensitive separated by difference primers.

| Primers     | Varieties      | Allele frequency |     |     |     | Genotype frequency |     |     |    |     |     |     |    |     |    |
|-------------|----------------|------------------|-----|-----|-----|--------------------|-----|-----|----|-----|-----|-----|----|-----|----|
|             |                | A                | B   | C   | D   | AA                 | AB  | AC  | AD | BB  | BC  | BD  | CC | CD  | DD |
| isotig03010 | Lamé           | 0.7              | 0.3 | .   | .   | 0.4                | 0.6 | .   | .  | .   | .   | .   | .  | .   | .  |
|             | Surathani 1    | .                | 1.0 | .   | .   | .                  | .   | .   | .  | 1.0 | .   | .   | .  | .   | .  |
|             | all of alleles | 0.7              | 1.3 | .   | .   | 0.4                | 0.6 | .   | .  | 1.0 | .   | .   | .  | .   | .  |
| isotig03937 | Lamé           | 1.0              | .   | .   | .   | 1.0                | .   | .   | .  | .   | .   | .   | .  | .   | .  |
|             | Surathani 1    | .                | 1.0 | .   | .   | .                  | .   | .   | .  | 1.0 | .   | .   | .  | .   | .  |
|             | all of alleles | 1.0              | 1.0 | .   | .   | 1.0                | .   | .   | .  | 1.0 | .   | .   | .  | .   | .  |
| isotig04263 | Lamé           | 0.1              | 0.4 | 0.5 | .   | .                  | .   | 0.2 | .  | .   | 0.8 | .   | .  | .   | .  |
|             | Surathani 1    | 0.3              | 0.7 | .   | .   | .                  | 0.6 | .   | .  | 0.4 | .   | .   | .  | .   | .  |
|             | all of alleles | 0.4              | 1.1 | 0.5 | .   | .                  | 0.6 | 0.2 | .  | 0.4 | 0.8 | .   | .  | .   | .  |
| isotig04783 | Lamé           | 0.3              | 0.7 | .   | .   | .                  | 0.6 | .   | .  | 0.4 | .   | .   | .  | .   | .  |
|             | Surathani 1    | .                | 1.0 | .   | .   | .                  | .   | .   | .  | 1.0 | .   | .   | .  | .   | .  |
|             | all of alleles | 0.3              | 1.7 | .   | .   | .                  | 0.6 | .   | .  | 1.4 | .   | .   | .  | .   | .  |
| isotig05050 | Lamé           | 0.5              | 0.2 | 0.3 | .   | .                  | 0.4 | 0.6 | .  | .   | .   | .   | .  | .   | .  |
|             | Surathani 1    | .                | 0.4 | 0.2 | 0.4 | .                  | .   | .   | .  | .   | 0.2 | 0.6 | .  | 0.2 | .  |
|             | all of alleles | 0.5              | 0.6 | 0.5 | 0.4 | .                  | 0.4 | 0.6 | .  | .   | 0.2 | 0.6 | .  | 0.2 | .  |

**Supplementary Table S7** The alignment of polymorphic EST-SSR primer with oil palm reference genome.

| Isotig<br>Number | BLASTX                                                                                   |                  |         |                     |
|------------------|------------------------------------------------------------------------------------------|------------------|---------|---------------------|
|                  | Gene Description                                                                         | NCBI Sequence ID | E-value | MPOB                |
| Isotig03101      | DEAD-box ATP-dependent<br>RNA helicase 46 [ <i>Elaeis<br/>guineensis</i> ]               | XP_010941500.1   | 9e-70   | p5.00_sc00010_p0030 |
| Isotig03937      | spliceosome-associated<br>protein 130 A<br>[ <i>Elaeis guineensis</i> ]                  | XP_010939835.1   | 1e-65   | p5.00_sc00036_p0020 |
| Isotig04263      | uncharacterized protein<br>LOC105040638<br>[ <i>Elaeis guineensis</i> ]                  | XP_010915560.1   | 4e-57   | p5.00_sc00001_p0241 |
| Isotig04783      | TATA-binding protein-<br>associated factor 2N isoform<br>X1 [ <i>Elaeis guineensis</i> ] | XP_010925244.1   | 3e-61   | p5.00_sc00039_p0021 |
| Isotig05050      | polyadenylate-binding<br>protein-interacting protein 7<br>[ <i>Elaeis guineensis</i> ]   | XP_010917460.1   | 2e-36   | p5.00_sc00064_p0097 |

**Supplementary Table S8** Oligo (dT) primers and arbitrary primers sequencing used for DDRT-PCR.

| <b>Primers</b> | <b>Sequence</b>                     |
|----------------|-------------------------------------|
| oligo (dT) 1   | 5'-CATTATGCTGAGTGATATCTTTTTTTTAC-3' |
| oligo (dT) 2   | 5'-CATTATGCTGAGTGATATCTTTTTTTTAG-3' |
| oligo (dT) 3   | 5'-CATTATGCTGAGTGATATCTTTTTTTTCA-3' |
| oligo (dT) 4   | 5'-CATTATGCTGAGTGATATCTTTTTTTTAA-3' |
| arbitrary 1    | 5'-ATTAACCCTCACTAAATCGGTCATAG-3'    |
| arbitrary 2    | 5'-ATTAACCCTCACTAAATGGAGCTGG-3'     |
| arbitrary 3    | 5'-ATTAACCCTCACTAAATGTGGCAGG-3'     |
| arbitrary 4    | 5'-ATTAACCCTCACTAAAGCACCGTCC-3'     |
| arbitrary 5    | 5'-ATTAACCCTCACTAAATGCTGGGGA-3'     |
| arbitrary 6    | 5'-ATTAACCCTCACTAAATGCTGGTGG-3'     |
